# Supplementary material for: A comparison of signal suppression and particle size distributions for ns- and fs-LA of metallic samples by LA-ETV-ICPMS
Source: Royal Society of Chemistry journal article supplement (doi:10.1039/c7ja00176b), 2017-01-01
Supplement: c7ja00176b1.pdf [file c7ja00176b1.pdf]

## Supplementary Information to

### A Comparison of Signal Suppression and Particle Size Distributions for ns- and fs-LA for metallic samples by LA-ETV-ICPMS

Hale Ceren Yilmaz, Bodo Hattendorf

Laboratory of Inorganic Chemistry, ETH Zurich, Vladimir-Prelog-Weg 1, CH-8093 Zurich, Switzerland.

E-mail: bodo@inorg.chem.ethz.ch; Tel: +41 44 633 45 23

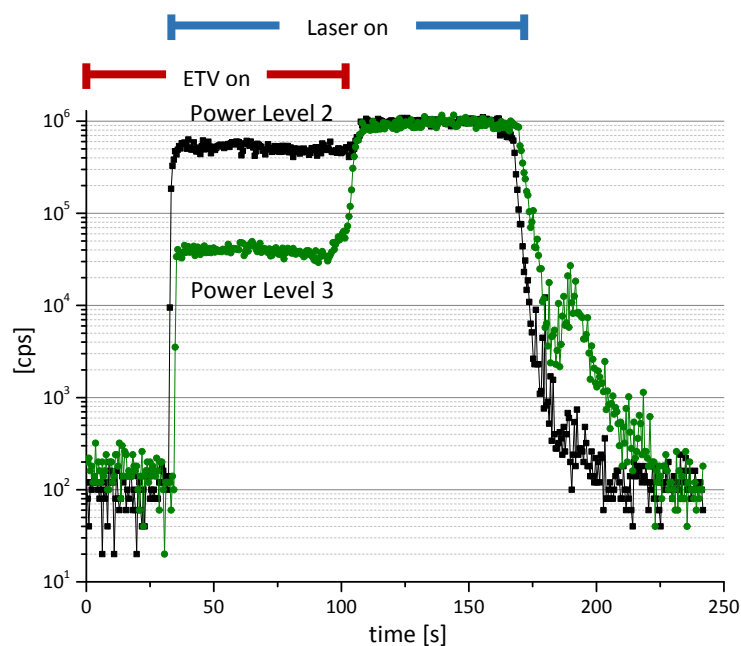

Figure S1. Transient signals for fs-LA-ICPMS of Zn, illustrating the experimental determination of signal suppression. 0 – 30 seconds: Gas blank, ETV on; 60 – 120 seconds: fs-LA-signal, ETV on; 120–180 seconds: LA-signal, ETV off; > 250 seconds: Gas blank ETV off. Signals were acquired at two different power levels of the ETV 4000 as indicated

### Aerosol structures for ns- and fs-ablation. Collection on filters and OPC analysis Pure Zn

i) ns-LA, original aerosol

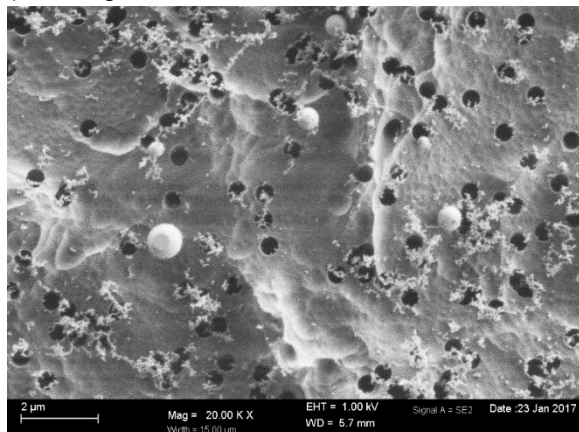

ii) fs-LA, original aerosol

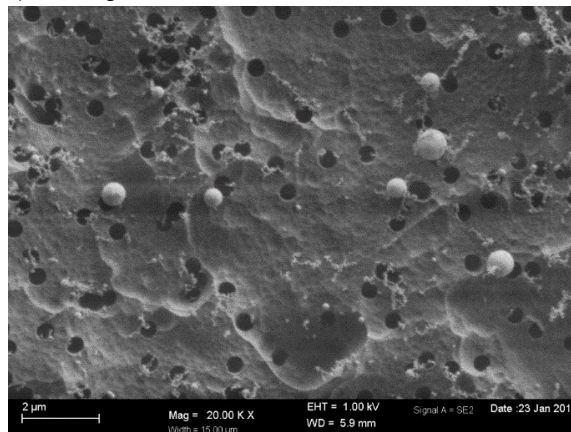

iii) ns-LA, power level 2.5

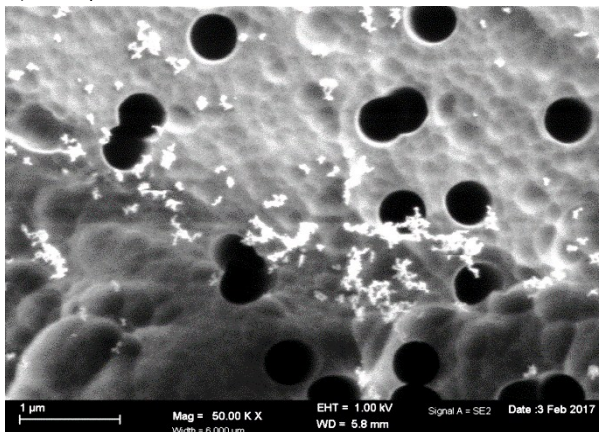

iv) fs-LA, power level 2.5

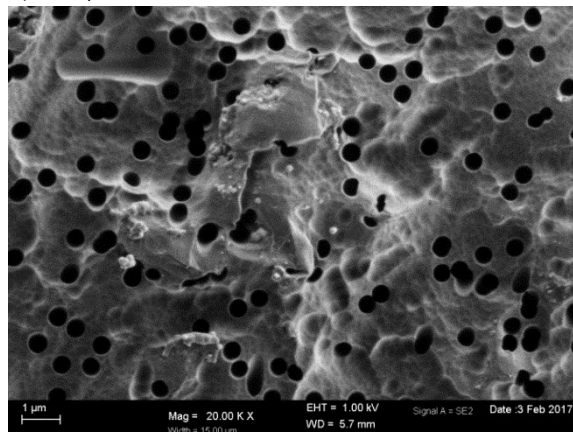

v) ns-LA, power level 3

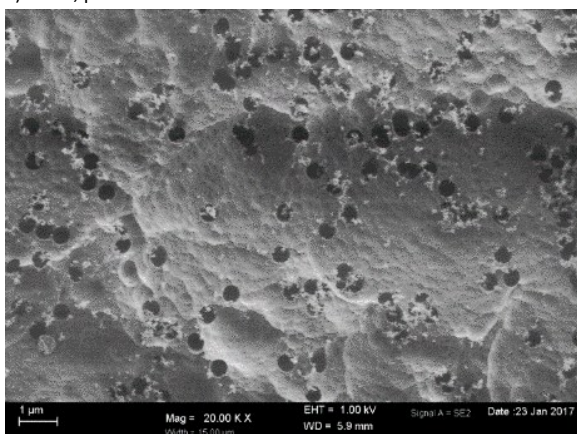

vi) fs-LA, power level 3

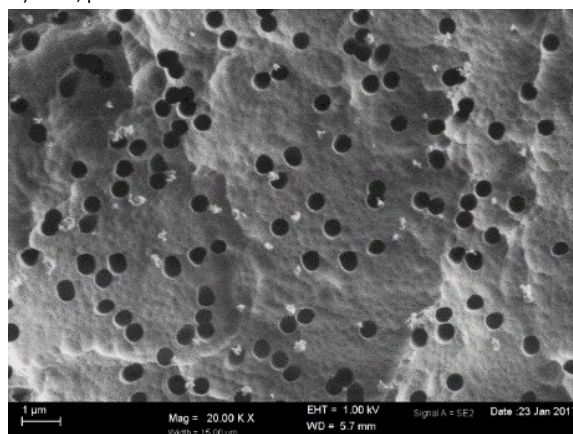

Figure S2 - SEM images of pure Zn.

i) ns-LA

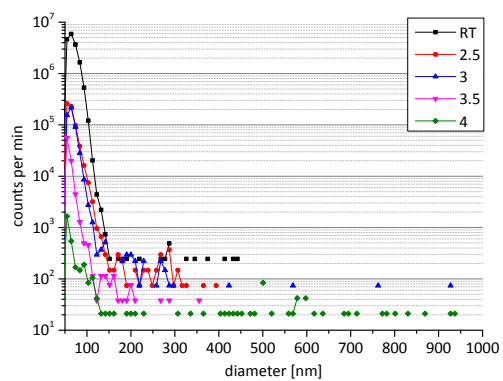

ii) fs-LA

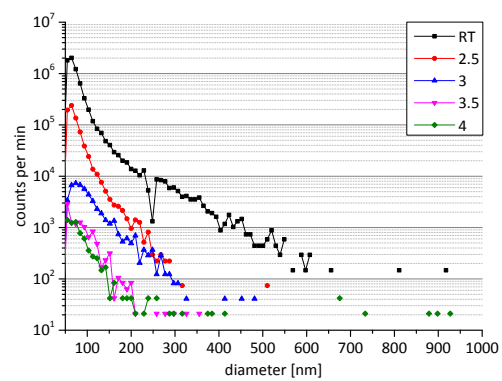

Figure S3 - PSD of pure Zn. Aerosol dilution factors were 174 for the initial aerosol, 74 at level 2.5, 41 at level 3, 21 at levels 3.5 and 4.

## Pure Cu

i) fs-LA, power level 4.5

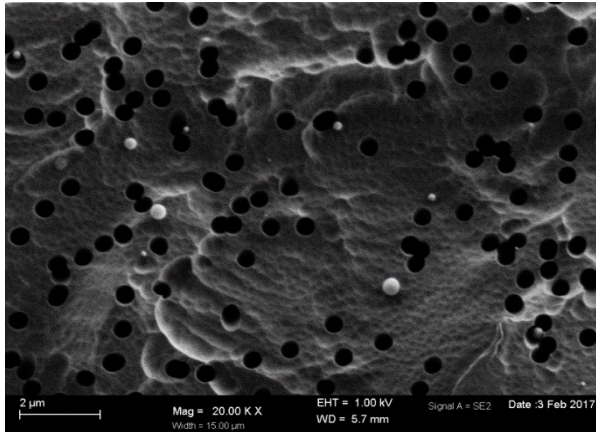

ii) fs-LA, power level 5.5

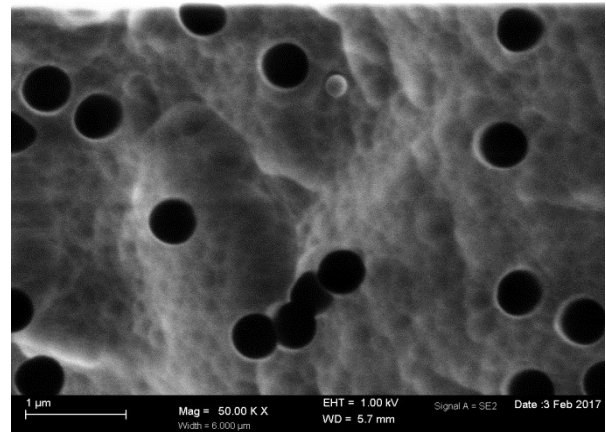

iii) fs-LA, power level 6.5

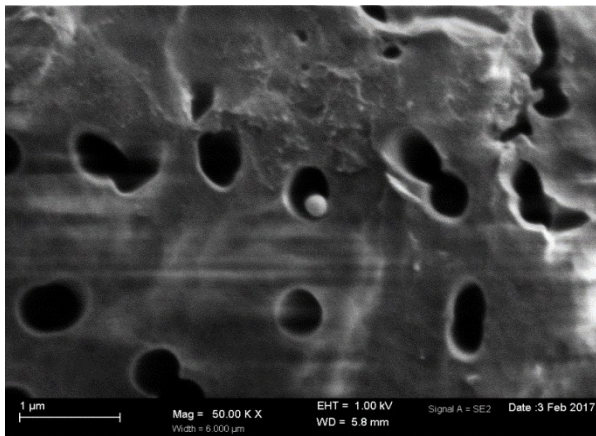

Figure S4 - SEM images of pure Cu.



## Brass

i) ns-LA, original aerosol

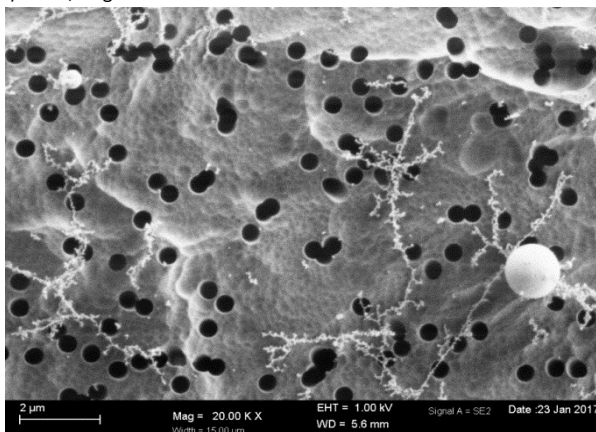

ii) fs-LA, original aerosol

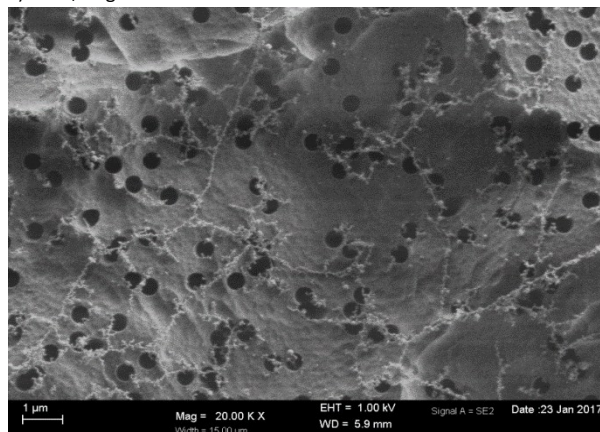

iii) ns-LA, power level 4.5

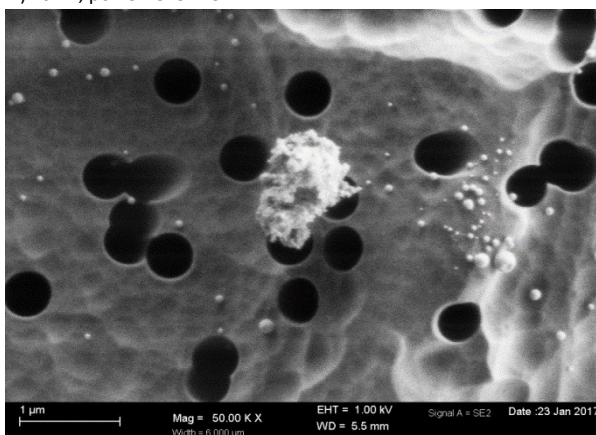

iv) fs-LA, power level 4.5

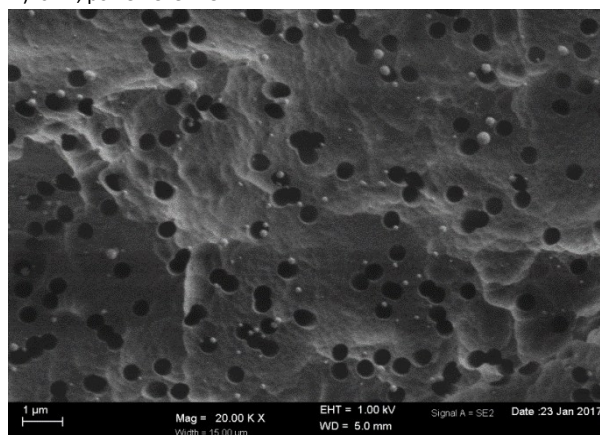

v) ns-LA, power level 5.5

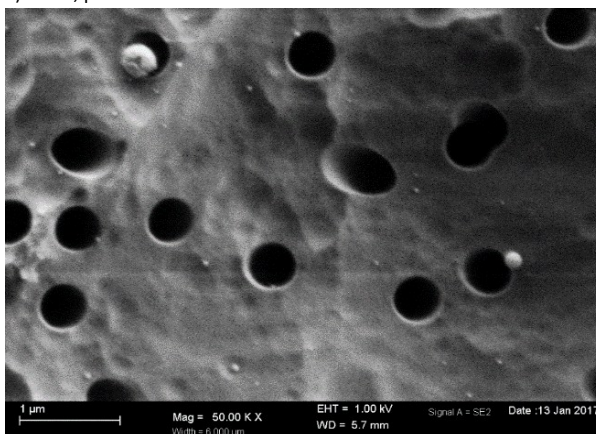

vi) fs-LA, power level 5.5

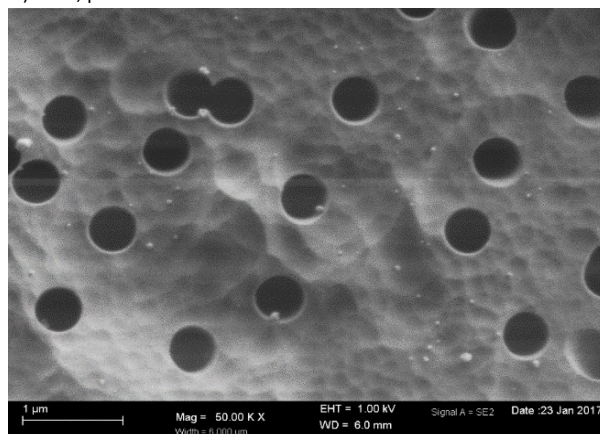

vii) ns-LA, power level 7

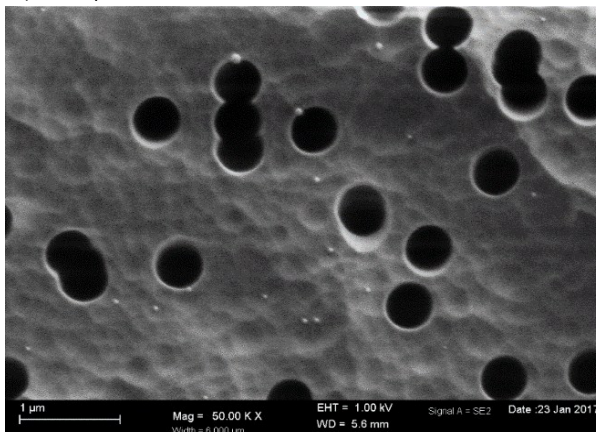

viii) fs-LA, power level 7

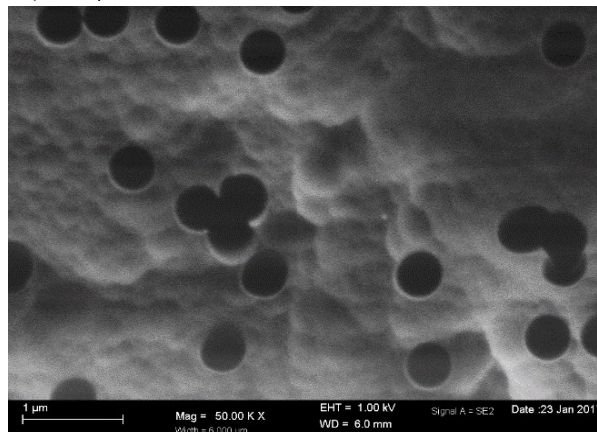

Figure S5 - SEM images of brass.

i) ns-LA

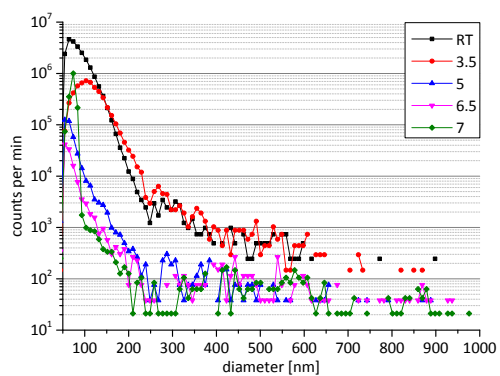

ii) fs-LA

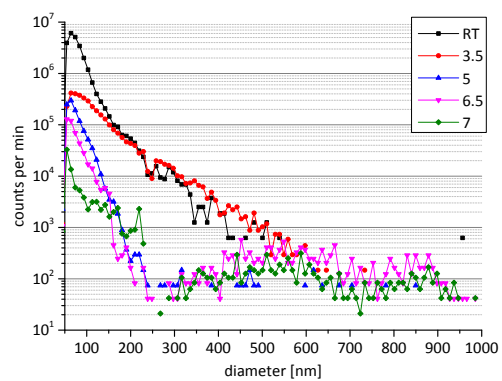

Figure S6. PSD of brass. Aerosol dilution factors were 245 (ns) and 625 (fs) for the initial aerosol, 147 at level 3.5, 38 (ns) and 74 (fs) at level 5, 38 (ns) and 41 (fs) at level 6 and 21 at level 7.



## Pure Ta

i) ns-LA, original aerosol

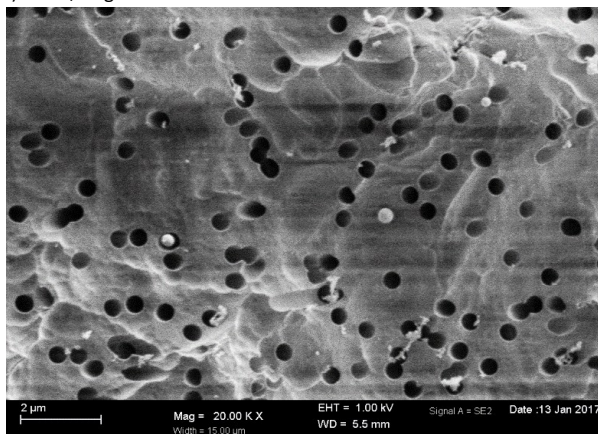

ii) fs-LA, original aerosol

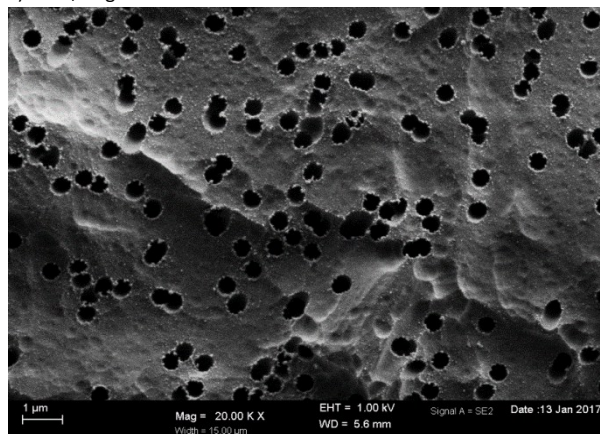

iii) ns-LA, power level 7

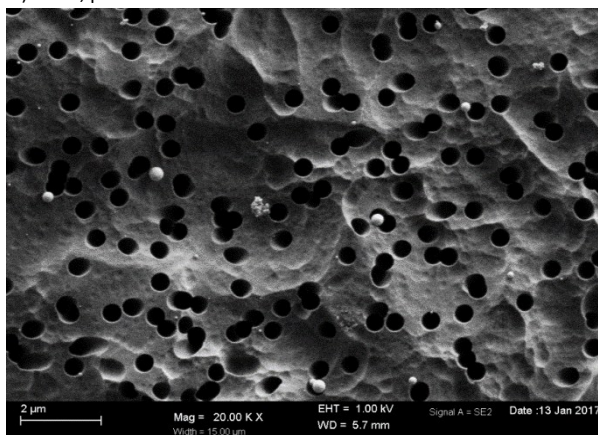

iv) fs-LA, power level 7

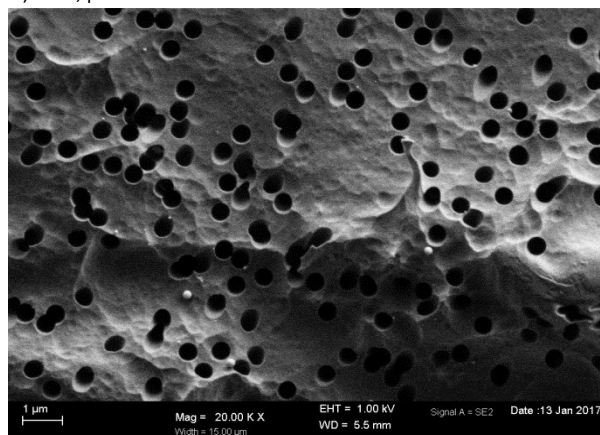

Figure S7 - SEM images of pure Ta.

i) ns-LA

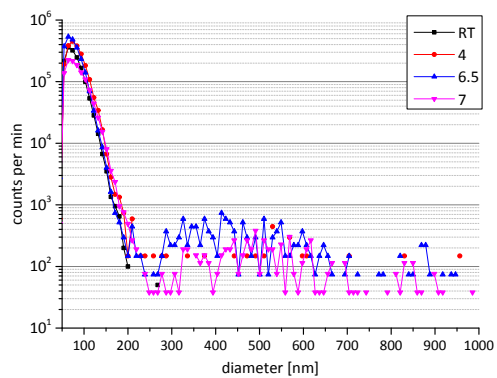

ii) fs-LA

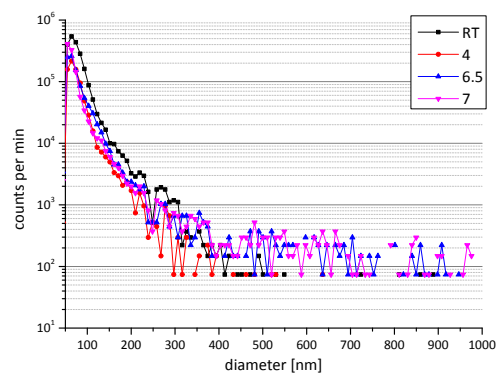

Figure S8 - PSD of Ta. Aerosol dilution factors for ns-LA were 50 for the original aerosol, 148 at power level 4, 74 at power level 6.5 and 38 at power level 7. The dilution factor for fs-LA was 74 for all measurements.

## Transient Signal Structures of Cu at different power levels.

### Brass vs. Cu

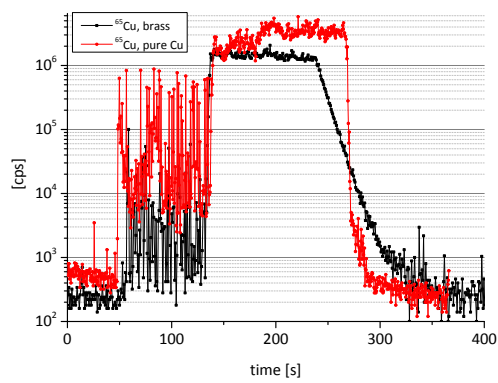

Figure S9 –  $^{65}\text{Cu}$ -transient for ns-LA for pure Cu and brass

### Cu at different power levels

A i) ns-LA, power level 5

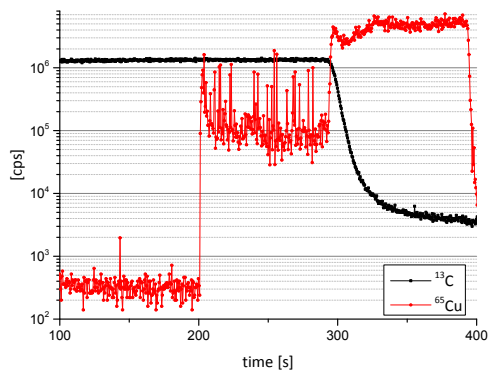

A ii) ns-LA, power level 5.5

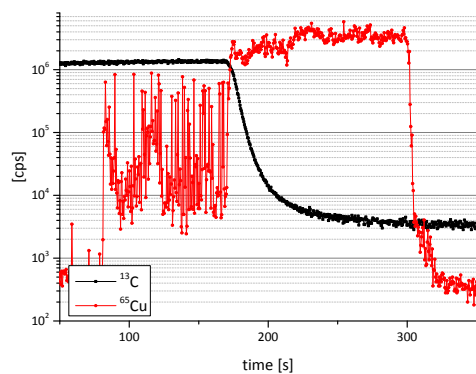

B i) fs-LA, power level 5

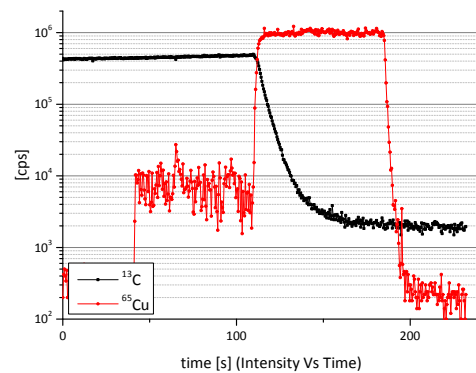

B ii) fs-LA, power level 5.5

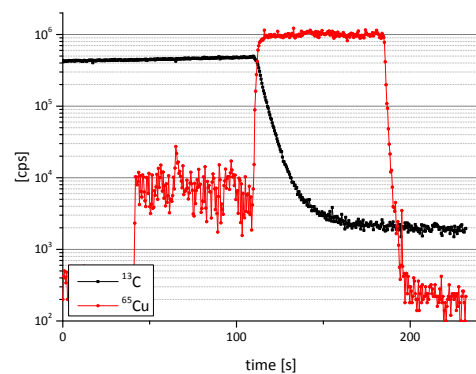

A iii) ns-LA, power level 6

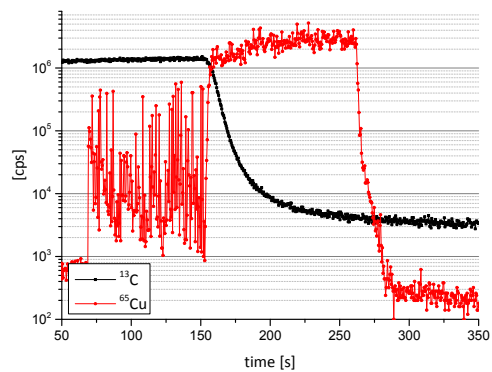

B iii) fs-LA, power level 6

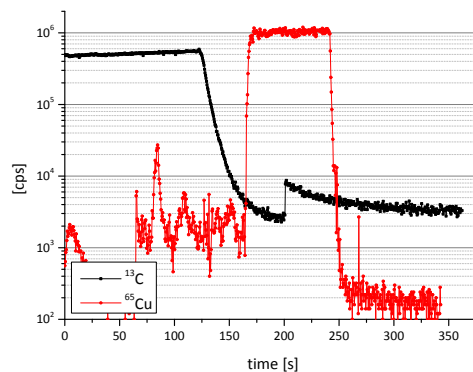

Figure S10 -  $^{65}\text{Cu}$ -transient signal for pure Cu.



## HGA-600MS as ETV unit: MHB B22, B24, and B26 heating profiles

Three brass samples (MB B22, B24 and B26) with differing Cu- and Zn-contents (Table S1) were investigated to identify possible matrix dependencies of the signal suppression of the  $^{65}\text{Cu}$ - and  $^{66}\text{Zn}$ -ion signals. A HGA-600MS ETV unit was used, equipped with a graphite tube ( $l = 28 \text{ mm}$ ,  $\varnothing = 6 \text{ mm}$ ) as heater. In contrast to the measurements performed with the ETV-4000, the temperature of the graphite furnace was increased continuously, with a rate of  $4.8^\circ \text{ C/s}$ . The heating protocol is summarized in Table S2. For ablation, the Excite Pharos fs-laser was used at a wavelength of  $257 \text{ nm}$ . Line scans with a scan rate of  $5 \mu\text{m/s}$  were performed with a repetition rate of  $5 \text{ Hz}$  and a spot size of  $20 \mu\text{m}$ . The laser energy was set to  $100\%$  and the measured fluence was  $7 \text{ J/cm}^2$ .

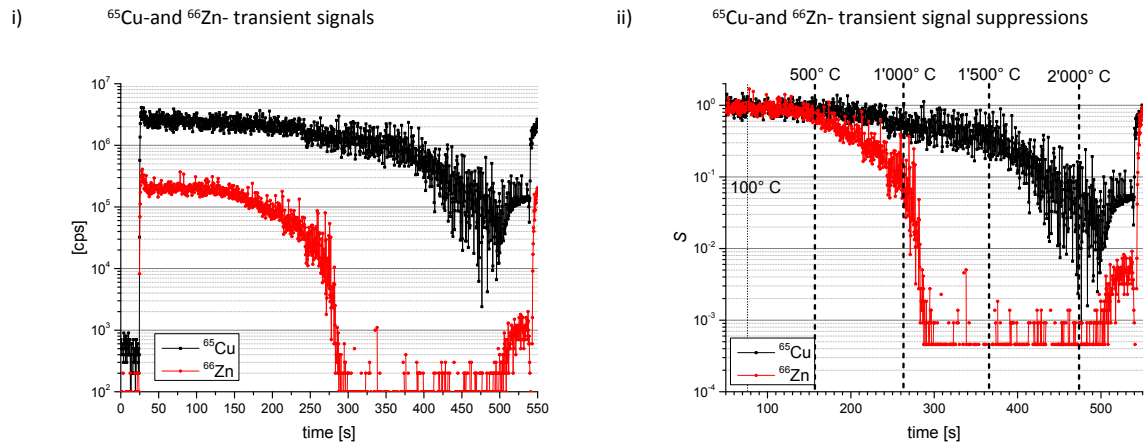

Figure S11 - i)  $^{65}\text{Cu}$ - and  $^{66}\text{Zn}$ - transient signals and ii) signal suppression transient profiles for  $^{65}\text{Cu}$ - and  $^{66}\text{Zn}$ - transient signals (normalized by the mean signals recorded without heating).for MBH B22.

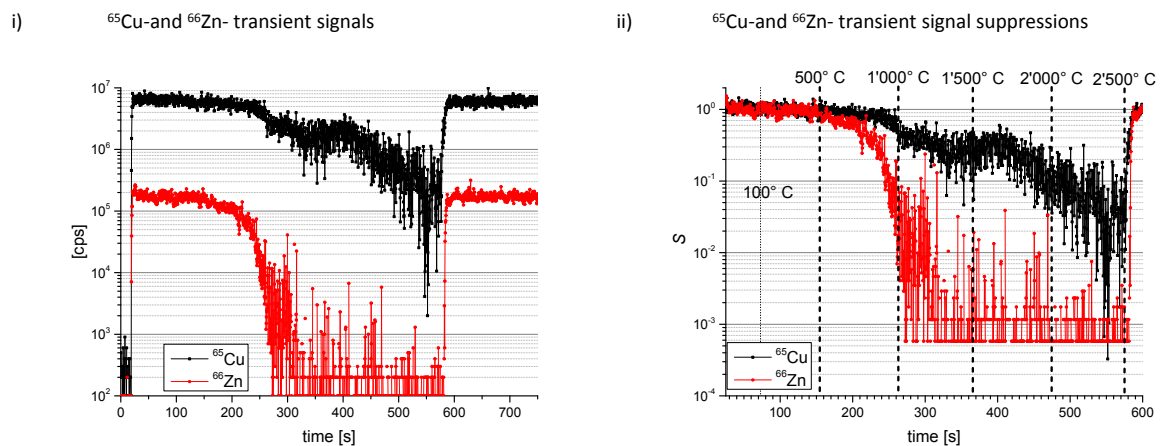

Figure S12 - i)  $^{65}\text{Cu}$ - and  $^{66}\text{Zn}$ - transient signals and ii) signal suppression transient profiles for  $^{65}\text{Cu}$ - and  $^{66}\text{Zn}$ - transient signals (normalized by the mean signals recorded without heating).for MBH B24.

i)  $^{65}\text{Cu}$ -and  $^{66}\text{Zn}$ - transient signals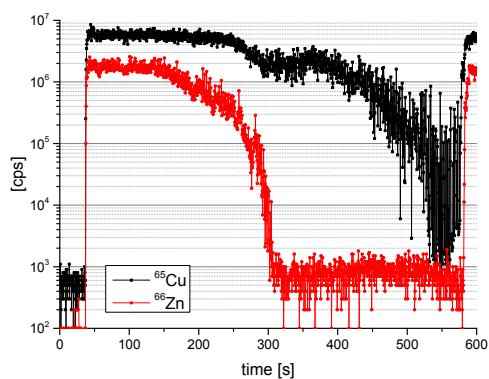ii)  $^{65}\text{Cu}$ -and  $^{66}\text{Zn}$ - transient signal suppressions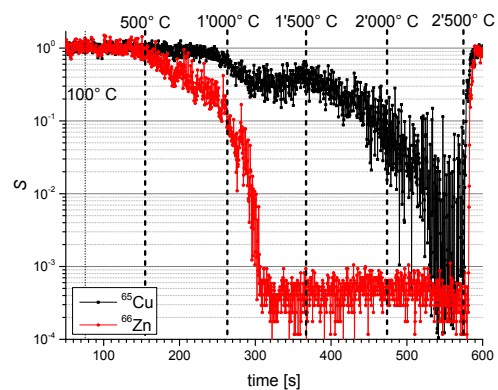

Figure S13 - i)  $^{65}\text{Cu}$ -and  $^{66}\text{Zn}$ - transient signals and ii) signal suppression transient profiles for  $^{65}\text{Cu}$ - and  $^{66}\text{Zn}$ - transient signals (normalized by the mean signals recorded without heating).for MBH B26.

Table S1 – Cu- and Zn-contents of the MBH B22, B24 and B26 brass standards.

| Percentage element by weight                      | MBH B22 | MBH B24 | MBH B26 |
|---------------------------------------------------|---------|---------|---------|
| Cu                                                | 82.47   | 95.65   | 62.93   |
| Zn                                                | 15.92   | 1.99    | 30.30   |
| Suppression of Cu at a tube temperature of 1800°C | 0.12175 | 0.11148 | 0.10952 |

Table S2 – Heating protocol for single temperature measurements

|                  | T [° C]                        | Duration        | Laser |
|------------------|--------------------------------|-----------------|-------|
| BG <sub>RT</sub> | 0                              | 30 s            | Off   |
| LA <sub>RT</sub> | 0                              | 30 s            | On    |
| LA <sub>H</sub>  | a) 100 – 2300<br>b) 100 – 2500 | 504 s, 4.8° C/s | On    |
| LA <sub>RT</sub> | 0                              | 30 s            | On    |
